# Supplementary material for: Homopolymer and ABC Triblock Copolymer Mixtures for Thermoresponsive Gel Formulations
Source: MDPI journal article supplement (doi:10.3390/gels7030116), 2021-08-09
Supplement: s1 [file s1]

# Homopolymers and ABC Triblock Copolymer Mixtures for Thermoresponsive gel Formulations

Anna P. Constantinou, Nikitas Provatakis, Qian Li and Theoni K. Georgiou\*

## Supplementary Information

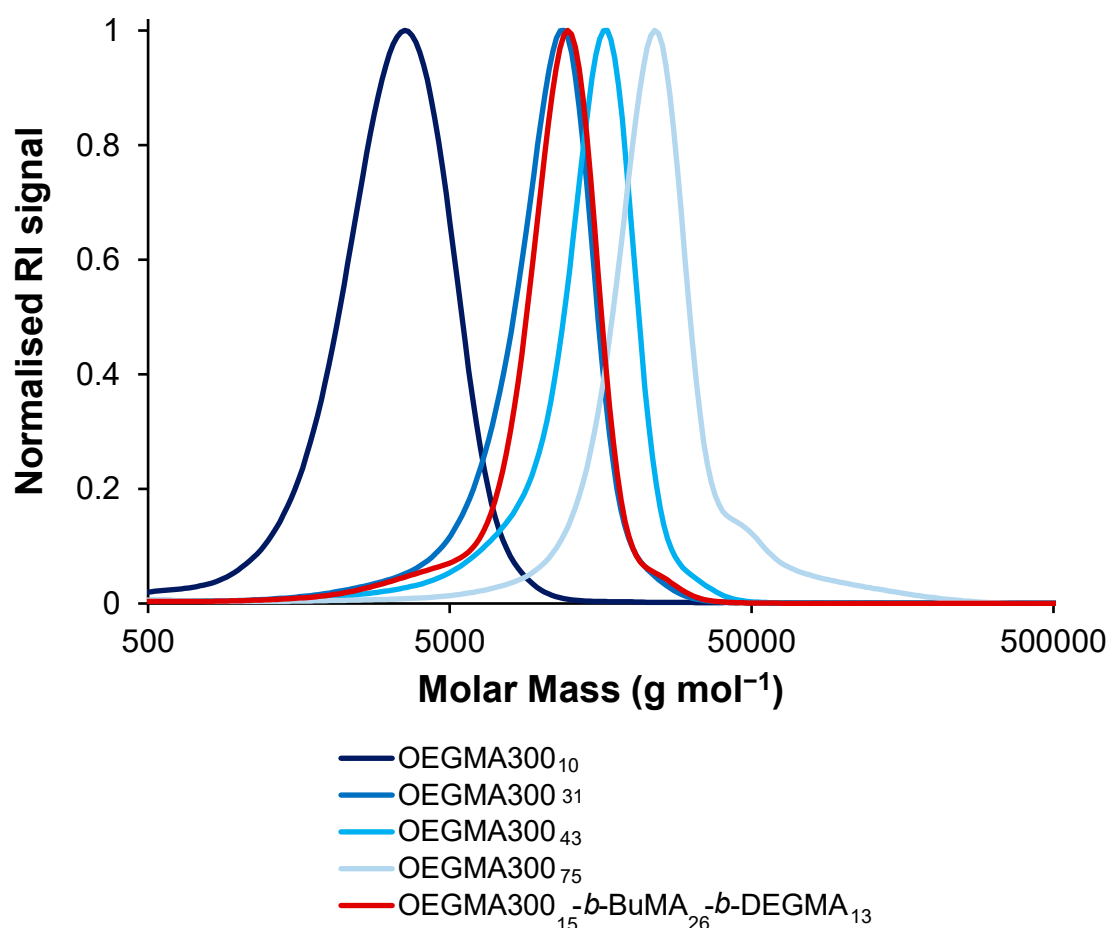

**Figure S1.** GPC traces of the final polymers after precipitation. OEGMA300 homopolymers of varying degrees of polymerisation are shown in blue: OEGMA300<sub>10</sub> in dark blue, OEGMA300<sub>31</sub> in blue, OEGMA300<sub>43</sub> in light blue, and OEGMA300<sub>75</sub> in faded blue. The triblock terpolymer is shown in dark red line.

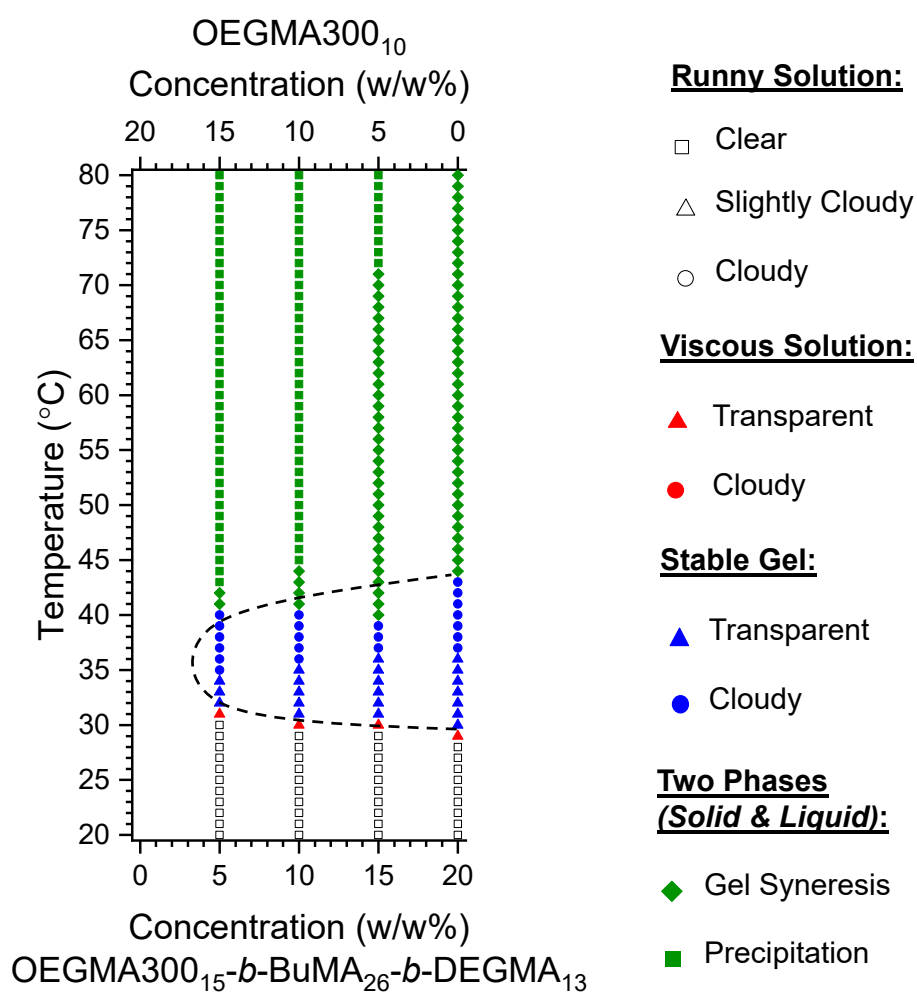

**Figure S2.** Phase diagram of the mixture of OEGMA300<sub>15</sub>-*b*-BuMA<sub>26</sub>-*b*-DEGMA<sub>13</sub> with OEGMA300<sub>10</sub> in phosphate buffered saline (PBS) with transitions showing up to 80 °C.

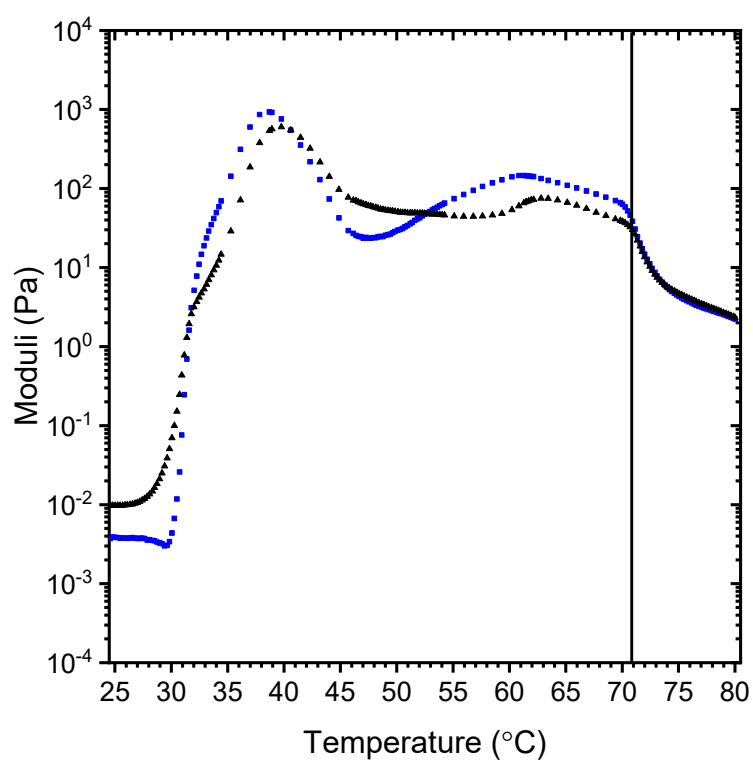

**Figure S3.** Temperature ramp rheological measurement on the mixture of OEGMA300<sub>15</sub>-*b*-BuMA<sub>26</sub>-*b*-DEGMA<sub>13</sub> with OEGMA300<sub>10</sub> at a ratio of 3:1 in phosphate buffered saline (PBS) with transitions showing up to 80 °C: storage modulus in blue squares and loss modulus in black triangles.
